# Supplementary material for: Therapy outcome measures in temporomandibular disorder: a scoping review
Source: HighWire-hosted journal article supplement (doi:10.1136/bmjopen-2022-061387), 2022-08-01
Supplement: bmjopen-2022-061387supp001_data_supplement.pdf [file bmjopen-2022-061387supp001_data_supplement.pdf]

Final search strategy for the MEDLINE database is presented in Additional file 1:

#### Appendix A

("2010"[Date - Publication] : "3000"[Date - Publication])) AND (((((english[la] OR japanese[la]) AND hasabstract[tw]) AND (("Treatment Outcome"[mh] OR outcome [tiab] OR "core outcome set"[tiab] OR "Quality of life"[mh] OR (patient participation[MeSH]) OR "patient-reported outcome measure"[tiab] OR PROM[tiab] OR "Pain Measurement"[mh] OR "Pain Measurement"[mh] OR "patient outcome assessment"[tw] OR "outcome measurement instrument"[tw] OR (Quality of life[tiab]) OR QOL[tw] OR HRQL[tw] OR (Patient report\*[tw]) OR (Patient-important\*[tw]) OR pain[tiab] OR disability\*[tiab] OR outcome\*[tiab] OR score[tiab] OR (health utility[tiab]) OR (health utilities[tiab]) OR (patient decision[tiab]) OR values[tiab] OR preferences[tiab] OR (patient preference[tw]) OR (patient satisfaction[MeSH]) OR (patient satisfaction[MeSH]) OR (attitude to health[MeSH])) AND ((splint\*[tiab] OR pharmacologic\*[tiab] OR NSAID\*[tiab] OR benzodiazepine\*[tiab] OR antidepressant\*[tiab] OR opioid\*[tiab] OR corticosteroid\*[tiab] OR "muscle relaxant"[tiab] OR herb\*[tiab] OR "physical therapy\*" [tiab] OR "manual therapy"[tiab] OR manipulation[tiab] OR laser[tiab] OR nonpharmacologic\* [tiab] OR non-pharmacologic\*[tiab] OR cognitive-behavioral[tiab] OR biobehavioral[tiab] OR biofeedback\*[tiab] OR Disc orientation[tiab]) AND ("Cranio-mandibular Disorders"[mh] OR "Cranio-mandibular\*" [tiab] OR "Temporomandibular Joint"[mh] OR Temporomandibular\*[tiab] OR "Myofascial Pain Syndromes"[mh] OR "Myofascial pain\*" [tiab] OR "Disc displacement"[tiab] OR "masticatory muscle disorders"[tiab] OR "temporomandibular joint disorders/therapy"[Mesh Terms]))) NOT (biography[pt] OR case reports[pt] OR comment[pt] OR directory[pt] OR editorial[pt] OR festschrift[pt] OR interview[pt] OR lecture[pt] OR letter[pt] OR news[pt] OR newspaper article[pt] OR patient education handout[pt] OR consensus development conference[pt] OR consensus development conference, nih[pt])) NOT (animals[MeSH Terms] NOT humans[MeSH Terms])). The search formulas for other databases are shown in an additional file.
